# Supplementary material for: Synthesis, Crystal Packing Aspects and Pseudosymmetry in Coordination Compounds with a Phosphorylamide Ligand
Source: MDPI journal article supplement (doi:10.3390/sym15010157), 2023-01-05
Supplement: s1 [file s1]

Archive with 1 entries (1 files):
- symmetry-2131309-supplementary.pdf
